# Supplementary material for: Deletion of MGF505-2R Gene Activates the cGAS-STING Pathway Leading to Attenuation and Protection against Virulent African Swine Fever Virus
Source: MDPI journal article supplement (doi:10.3390/vaccines12040407), 2024-04-11
Supplement: s1 [file s1]

**Table S1.** Clinical signs score index, based on [44].

|                                   |   |                                         |
|-----------------------------------|---|-----------------------------------------|
| Temperature                       | 0 | <39                                     |
|                                   | 1 | 39.0 < to < 39.5                        |
|                                   | 2 | 39.5 ≤ to < 40                          |
|                                   | 3 | 40.0 to ≤ 40.5                          |
|                                   | 4 | 40.6 to ≤ 41                            |
|                                   | 5 | <39, >41                                |
| Inappetence                       | 0 | Normal                                  |
|                                   | 1 | Reduced eating                          |
|                                   | 4 | Only picking at food                    |
|                                   | 6 | Not eating                              |
| Recumbancy                        | 0 | Normal                                  |
|                                   | 1 | Lethargic                               |
|                                   | 2 | Get up only when touched                |
|                                   | 4 | Slow to get up when touched             |
|                                   | 6 | Remain recumbent when touched           |
| Skin hemorrhage                   | 0 | Normal                                  |
|                                   | 1 | Hemorrhagic areas on ears and body      |
|                                   | 3 | Generalized hemorrhage all over body    |
| Joint swelling                    | 0 | Normal                                  |
|                                   | 1 | A joint swelling                        |
|                                   | 4 | Severe swelling with difficulty walking |
| Labored breathing and/or coughing | 0 | Normal                                  |
|                                   | 1 | Mild                                    |
|                                   | 3 | Severe                                  |
| Ocular discharge                  | 0 | Normal                                  |
|                                   | 1 | Gummed up eyes                          |
| Diarrhea                          | 0 | Normal                                  |
|                                   | 1 | Diarrhea                                |
|                                   | 4 | Bloody diarrhea                         |
| Urine                             | 4 | Blood urine                             |
| Vomiting                          | 4 | Vomiting                                |

**Table S2.** Clinical sign score of vaccine immunized pigs in Animal Experiment I.

| dpv   | Clinical sign score |     |
|-------|---------------------|-----|
|       | Ave                 | SD  |
| 0dpv  | 2.8                 | 1.0 |
| 1dpv  | 2.8                 | 1.5 |
| 2dpv  | 2.5                 | 1.9 |
| 3dpv  | 0.3                 | 0.5 |
| 4dpv  | 2.3                 | 1.3 |
| 5dpv  | 1.3                 | 0.5 |
| 6dpv  | 2.8                 | 1.5 |
| 7dpv  | 1.0                 | 0.8 |
| 8dpv  | 1.8                 | 0.5 |
| 9dpv  | 0.0                 | 0.0 |
| 10dpv | 2.0                 | 0.8 |
| 11dpv | 3.0                 | 2.0 |
| 12dpv | 2.5                 | 1.7 |
| 13dpv | 2.0                 | 0.8 |
| 14dpv | 1.8                 | 0.5 |
| 15dpv | 1.8                 | 0.5 |
| 16dpv | 1.3                 | 1.0 |
| 17dpv | 2.3                 | 1.3 |
| 18dpv | 0.0                 | 0.0 |
| 19dpv | 1.8                 | 0.5 |
| 20dpv | 2.0                 | 0.8 |
| 21dpv | 0.0                 | 0.0 |
| 22dpv | 0.0                 | 0.0 |
| 23dpv | 0.0                 | 0.0 |
| 24dpv | 0.0                 | 0.0 |
| 25dpv | 0.0                 | 0.0 |
| 26dpv | 0.0                 | 0.0 |
| 27dpv | 0.0                 | 0.0 |
| 28dpv | 2.0                 | 0.8 |
